# Supplementary material
Source: PubMed Central journal article supplement (PMC2853952)
Supplement: NIHMS182217-supplement-supplement_1.pdf [file NIHMS182217-supplement-supplement_1.pdf]

### Supplemental table 1

Case classification based on WHO case definitions and expert physician's opinion

| WHO criteria | Physician diagnosis |     |          |          |          |          | Total |
|--------------|---------------------|-----|----------|----------|----------|----------|-------|
|              | OFI                 | DF  | DHF gr 1 | DHF gr 2 | DHF gr 3 | DHF gr 4 |       |
| DF           | 0                   | 240 | 6        | 18       | 0        | 0        | 264   |
| DHF gr 1     | 0                   | 3   | 7        | 0        | 2        | 0        | 12    |
| DHF gr 2     | 0                   | 22  | 0        | 89       | 17       | 0        | 128   |
| DHF gr 3     | 0                   | 0   | 0        | 0        | 9        | 0        | 9     |
| DHF gr 4     | 0                   | 0   | 0        | 0        | 0        | 1        | 1     |
| Total        | 599                 | 265 | 13       | 107      | 28       | 1        | 1013  |

**Supplemental table 2**

Bleeding observed during hospitalization.

| Clinical diagnosis | Epistaxis<br>(case (%)) | Hematemesis<br>(case (%)) | Melena<br>(case (%)) | Others<br>(case (%)) | Skin<br>(case (%)) | Tourniquet test only<br>(case (%)) |
|--------------------|-------------------------|---------------------------|----------------------|----------------------|--------------------|------------------------------------|
| DHF                | 41(28)                  | 34(23)                    | 16(11)               | 7(4)                 | 115(78)            | 12(9)                              |
| DHF grade 1        | 0(0)                    | 0(0)                      | 0(0)                 | 0(0)                 | 0(0)               | 12(100)                            |
| DHF grade 2        | 40(31)                  | 29(23)                    | 14(11)               | 7(5)                 | 110(86)            | 0(0)                               |
| DHF grade 3        | 1(11)                   | 4(44)                     | 2(22)                | 0(0)                 | 4(44)              | 2(22)                              |
| DHF grade 4        | 0(0)                    | 1(100)                    | 0(0)                 | 0(0)                 | 1(100)             | 0(0)                               |
| DF                 | 50(19)                  | 11(4)                     | 11(4)                | 3(1)                 | 154(58)            | 46(17)                             |
| OFI                | 75(13)                  | 12(2)                     | 17(3)                | 3(1)                 | 245(40)            | 72(12)                             |

### Supplemental Table 3

Sensitivity and specificity of individual and combinations of signs of plasma leakage in physician-diagnosed DHF and DF patients and patients classified based on intervention requirement. (P:pleural effusion, A:Ascitis, H:hemoconcentration).

| Clinical classification               | Parameters  | P (%) | A (%) | H (%) | P+A (%) | P+H (%) | A+H (%) | P+A+H (%) | P or A or H (%) |
|---------------------------------------|-------------|-------|-------|-------|---------|---------|---------|-----------|-----------------|
| DHF vs DF                             | Sensitivity | 79    | 35    | 69    | 7       | 22      | 1       | 27        | 100             |
|                                       | Specificity | 91    | 97    | 85    | 98      | 99      | 100     | 100       | 76              |
| DRI vs No intervention (dengue cases) | Sensitivity | 64    | 45    | 53    | 9       | 12      | 2       | 32        | 75              |
|                                       | Specificity | 78    | 99    | 74    | 99      | 93      | 100     | 100       | 58              |
